# Supplementary material for: Exposed yet unmapped? Evidence of differential flood exposure in deprived urban areas using citizen science
Source: Research Square preprint supplement (doi:10.21203/rs.3.rs-6956238/v1), 2025-09-26
Supplement: Supplementary file 1 [file 526cc038a3c474e21e34237b.pdf]

# Supplementary Information

## Exposed yet unmapped? Evidence of differential flood exposure in deprived urban areas using citizen science

### Table of Contents

|                                              |    |
|----------------------------------------------|----|
| Flood proneness - intra-urban analysis ..... | 1  |
| Flood inventory .....                        | 2  |
| Flood model experiments .....                | 3  |
| Manual Workflows in QGIS .....               | 5  |
| Catchment Delineation .....                  | 5  |
| SPI Computation .....                        | 6  |
| Rainfall Analysis in Excel .....             | 6  |
| Statistical comparison of GOB and GHSL ..... | 8  |
| Workshop Protocols .....                     | 9  |
| Content Analysis Methodology .....           | 12 |

### Flood proneness - intra-urban analysis

This section compares the most flood-prone districts in each city with different flood depth thresholds. The results show that often the most flood-prone districts are exposed to all flood depths in Beira, Tema, Kisumu and Nairobi (Figure SI 1). This finding indicates persistent flood patterns, where more exposed areas do not necessarily reduce by increasing flood depth.

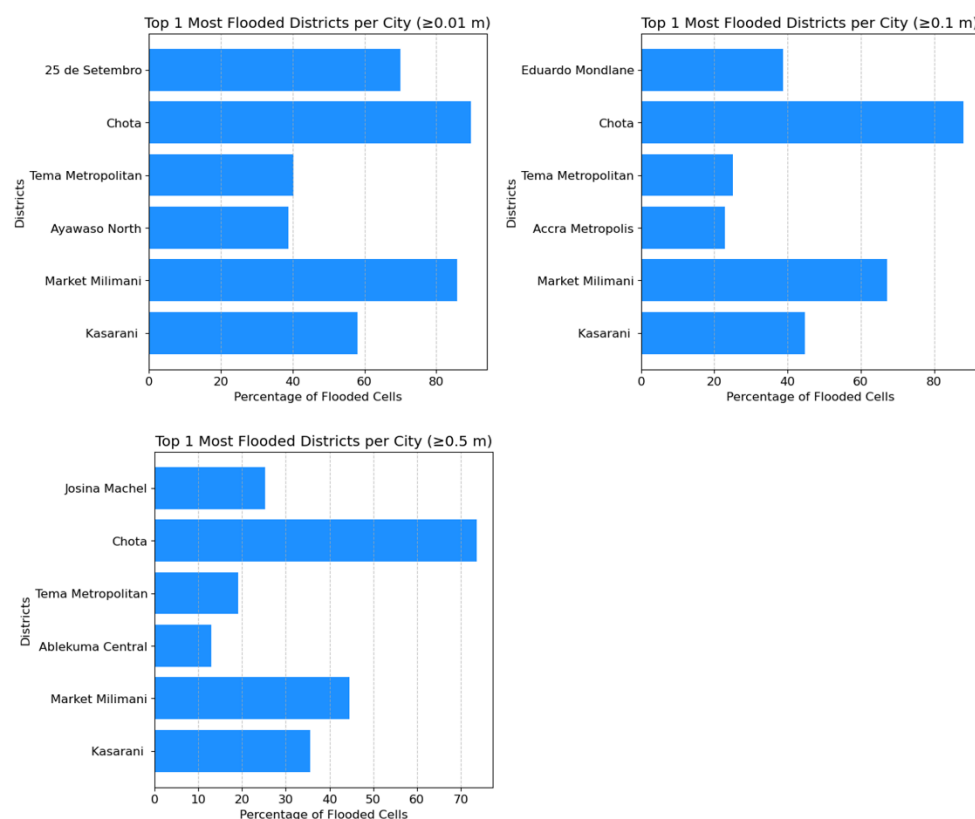

Figure SI 1 - Most flooded districts per city in each flood depth threshold.

## Flood inventory

We had serious difficulties locating flood hazard maps and assessments at city scale for the study areas. When available in publications, responses for data acquisition were rare; when available in government reports, maps were provided at national scale and at city level only processed statistical data provided. At the same time, we could find multiple sources of aspatial flood information that highlighted the alarming historical patterns of flood in the cities, e.g., the Kenyan National Climate Change Action Plan report<sup>1</sup> and the Ghana's Fourth National Communication under the United Nations Framework Convention on Climate Change<sup>2</sup>. To understand the nature of flooding impacts in the study areas and select the events for flood modelling, we conducted a historical inspection for the last 20 years. Here verified flood events reported online for each city, through an extensive (non-exhaustive) search, and crosschecked with the Dartmouth Flood Observation (DFO) database and official records from relevant national authorities. We excluded online news articles that lacked information on impacts or did not explicitly mention the selected cities as affected areas. Table SI 1 below is a summary of the findings. Although biased by the search in English, it is clear that evidence on secondary cities is not easily accessible, indicating less attention to these area at national scale, but also digital and technological disparities<sup>3</sup>.

| Location        | Date    | Impacts                                                              | Sources                                                                                                                                                                                           |
|-----------------|---------|----------------------------------------------------------------------|---------------------------------------------------------------------------------------------------------------------------------------------------------------------------------------------------|
| Greater Accra   | 06/2023 | 8 fatalities                                                         | <a href="https://floodlist.com/africa/ghana-floods-june-2023">https://floodlist.com/africa/ghana-floods-june-2023</a>                                                                             |
|                 | 03/2023 | 3 fatalities                                                         | <a href="#">Ghana – Accra Floods Cause Damage and Fatalities – FloodList</a>                                                                                                                      |
|                 | 06/2021 | 4 deaths, 6 injured, 200 displaced                                   | <a href="https://ercportal.jrc.ec.europa.eu/ECHO-Products/Echo-Flash#/daily-flash-archive/4230">https://ercportal.jrc.ec.europa.eu/ECHO-Products/Echo-Flash#/daily-flash-archive/4230</a>         |
|                 | 04/2019 | 12 deaths                                                            | <a href="https://floodlist.com/africa/ghana-deadly-floods-accra-april-2019">https://floodlist.com/africa/ghana-deadly-floods-accra-april-2019</a>                                                 |
|                 | 06/2018 | 5 deaths; over 500 displaced;                                        | <a href="#">Ghana – Devastating Floods Hit Accra Again – FloodList</a>                                                                                                                            |
|                 | 06/2016 | 5 deaths                                                             | News (The Watchers) & FloodList <a href="#">Ghana – Deadly Floods Hit Central Region – FloodList</a>                                                                                              |
|                 | 06/2015 | Explosion of Fuel Station caused by torrential rainfall (154 deaths) | <a href="https://www.theguardian.com/world/2015/jun/05/death-toll-accra-floods-petrol-station-fire">https://www.theguardian.com/world/2015/jun/05/death-toll-accra-floods-petrol-station-fire</a> |
| Beira & Chimoio | 03/2024 | over 11000 households displaced and 2 deaths                         | <a href="#">Mozambique - Maputo heavy rains and Tropical Storm Filipo - Flash Update No. 3 (28 March 2024)   OCHA</a>                                                                             |
|                 | 03/2023 | Over 200000 displaced, over 180 deaths                               | <a href="#">Mozambique: Floods - Feb 2023   ReliefWeb</a>                                                                                                                                         |
|                 | 01/2021 | 6 fatalities, 8000 displaced                                         | <a href="#">Southern Africa – Tropical Cyclone Eloise Triggers Floods in Mozambique, Zimbabwe and South Africa – FloodList</a>                                                                    |
|                 | 12/2020 | Over 3 deaths                                                        | <a href="#">Mozambique – Flash Floods in Beira, Sofala Province, After Heavy Rain – FloodList</a>                                                                                                 |
|                 | 03/2019 | 48 deaths (Mozambique)                                               | <a href="#">Mozambique and Zimbabwe – Tropical Cyclone Idai Causes Death and Destruction – FloodList</a>                                                                                          |
| Nairobi         | 04/2024 | 39 deaths, over 20000 displaced                                      | <a href="#">At least 39 people killed, 20,000 displaced by floods in Nairobi</a><br><a href="#">Kenya: Heavy Rains and Flooding Update - Flash Update #5 (10 May 2024)   OCHA</a>                 |

|                  |         |                                             |                                                                                                                                                                                             |
|------------------|---------|---------------------------------------------|---------------------------------------------------------------------------------------------------------------------------------------------------------------------------------------------|
| Kisumu           | 04/2023 | 4, 500 Households Displaced                 | <a href="https://www.kenyanews.go.ke/4-500-households-displaced-by-floods-in-kisumu/">https://www.kenyanews.go.ke/4-500-households-displaced-by-floods-in-kisumu/</a>                       |
| Kisumu & Nairobi | 04/2022 | 8,850 displaced households                  | <a href="https://reliefweb.int/report/kenya/kenya-floods-dref-operation-n-mdrke047-final-report">https://reliefweb.int/report/kenya/kenya-floods-dref-operation-n-mdrke047-final-report</a> |
| Kisumu & Nairobi | 05/2021 | Over 13000 families displaced; 9 fatalities | <a href="https://floodlist.com/africa/kenya-floods-update-may-2021">https://floodlist.com/africa/kenya-floods-update-may-2021</a>                                                           |
| Kisumu           | 04/2020 | 13000 displaced                             | <a href="#">13,300 displaced in flood-hit parts of Kisumu County – Kenya News Agency</a>                                                                                                    |
| Kisumu           | 06/2018 | Over 7000 people displaced                  | <a href="#">Kenya Floods Response Update – 8 June 2018, Flash Update - Kenya   ReliefWeb</a>                                                                                                |
| Nairobi          | 04/2016 | Over 10 deaths                              | <a href="https://floodlist.com/africa/kenya-floods-building-collapses-huruma-nairobi">https://floodlist.com/africa/kenya-floods-building-collapses-huruma-nairobi</a>                       |

Table SI 1 - Summary of flood inventory.

### Flood model experiments

We split the FastFlood model experiments into two sets: 1) in the pilot city, experiments with different sets of input and calibration parameters( Table SI 2); 2) the other five cities replicating the tests with core input datasets (Table SI 3). We restricted the model simulation to core input after the simulations done in Nairobi for two main reasons. First, more complex model setup leads to an exponential escalation of computational time (and recurrent time out errors). Second, in the absence of validation reference sources, visual assessment is time-consuming and hard for interpretation. The hydrodynamic effects might be incomprehensible for city planners (targeted local stakeholders) and increasing usability of the modelling tool is important for this research. Considering a resource-prohibitive environment, with limited staff and computation capacity, we opt for a simplified calibration process.

| Input Data                                                                     | Calibration Parameters | Output Remarks                                                                                           |
|--------------------------------------------------------------------------------|------------------------|----------------------------------------------------------------------------------------------------------|
| SRTM 40m                                                                       |                        | Computational Time (CT) = under 30s<br>Max Flood Depth (MFD) = 19m                                       |
| SRTM 40m<br>WorldCover 10m                                                     |                        | CT = under 30 seconds<br>MFD = 22m                                                                       |
| SRTM 40m<br>WorldCover 10m<br>Soilgrids (5-15cm)                               |                        | CT = under 30s<br>MFD = 22m                                                                              |
| SRTM 40m<br>WorldCover 10m<br>Soilgrids (5-15cm)<br>Channels (Automatic)       |                        | CT = under 30s<br>MFD = 40 m                                                                             |
| Copernicus 40m<br>WorldCover 10m<br>Soilgrids (5-15cm)                         |                        | CT = under 30s<br>MFD = 30m                                                                              |
| Copernicus 40m<br>WorldCover 10m<br>Soilgrids (5-15cm)<br>Channels (Automatic) |                        | CT = under 30 seconds<br>MFD = 46m<br>Visualization (VIZ) = less pixelized, better depiction of channels |
| Copernicus 40m<br>WorldCover 10m<br>Soilgrids (5-15cm)<br>Rainfall (Nov/2019)  |                        | CT = under 30 seconds<br>MFD = 22m                                                                       |
| Copernicus 40m<br>WorldCover 10m<br>Soilgrids (5-15cm)<br>Rainfall (Nov/2019)  | Flat terrain activated | CT = under 90s<br>MFD = 29m<br>VIZ = higher depth and spread streams and water bodies                    |

|                                                                                                        |                                                                       |                                                                                                    |
|--------------------------------------------------------------------------------------------------------|-----------------------------------------------------------------------|----------------------------------------------------------------------------------------------------|
| Copernicus 40m<br>WorldCover 10m<br>Soilgrids (5-15cm)<br>Rainfall (Nov/2019)                          | Flat terrain activated<br>Output discharge<br>Account for depressions | CT = under 120s<br>VIZ = pixelated results                                                         |
| Copernicus 40m<br>WorldCover 10m<br>Soilgrids (5-15cm)<br>Channel (Automatic)<br>Rainfall (Nov/2019)   | Flat terrain activated                                                | CT = under 120s<br>MFD = 37m<br>VIZ= whole city exposed (unrealistic)                              |
| Copernicus 40m<br>WorldCover 10m<br>Soilgrids (5-15cm)<br>Channel (Automatic)<br>Rainfall (Nov/2019)   | Flat terrain activated<br>Output discharge<br>Account for depressions | CT = under 150s<br>MFD = 32m<br>VIZ = unflooded depression patches                                 |
| Copernicu 40m<br>WorldCover 10m<br>Soilgrids (5-15cm)<br>Channel (Multipliers)<br>Rainfall (Nov/2019)  | Flat terrain activated                                                | CT = 160 seconds<br>MFD = 27m<br>Channels are not part of a flood mitigation network (unrealistic) |
| Copernicus 40m<br>WorldCover 10m<br>Soilgrids (5-15cm)<br>Channel (Multipliers)<br>Rainfall (Nov/2019) | Flat terrain activated<br>Solver Accuracy (High)                      | CT = 7 minutes<br>MFD= 33m<br>VIZ = larger flood extent and depth compared to model 14             |

*Table SI 2 - FastFlood experiments conducted in Nairobi (pilot city). Marked in blue is the chosen model.*

| City         | Input Data                                                                                                               | Output Remarks                                                                   |
|--------------|--------------------------------------------------------------------------------------------------------------------------|----------------------------------------------------------------------------------|
| Kisumu       | Copernicus GLO 40m<br>WorldCover 10m                                                                                     |                                                                                  |
|              | SRTM 40m<br>WorldCover 10m                                                                                               | VIZ = Salt and pepper effects<br>Lower MFD                                       |
|              | Copernicus GLO 40m<br>WorldCover 10m<br>Soilgrids (5-15cm)                                                               | VIZ = Flood extent spread outside major rivers (more realistic)                  |
|              | Copernicus GLO 40m<br>WorldCover 10m<br>Soilgrids (5-15cm)                                                               | MFD = 10m<br>VIZ = Larger flood extent (into minor waterways too)                |
|              | Copernicus GLO 40m<br>WorldCover 10m<br>Soilgrids (5-15cm)<br>Rainfall (May/2021)                                        | Inclusion of rainfall cut MFD in half max flood depth reduced to half (5.5m)     |
|              | Copernicus GLO 40m<br>WorldCover 10m<br>Soilgrids (5-15cm)<br>Rainfall (May/2021)<br>Flat terrain                        | MFD = 8.5m<br>VIZ = whole city exposed (unrealistic)                             |
|              | Copernicus GLO 40m<br>WorldCover 10m<br>Soilgrids (5-15cm)<br>Rainfall (May/2021)<br>Channel (Automatic)<br>Flat terrain | MFD = 9.5m<br>VIZ = DEM resolution issues lead to unrealistic simulated channels |
| Accra & Tema | Copernicus GLO 40m<br>WorldCover 10m                                                                                     |                                                                                  |
|              | SRTM 40m<br>WorldCover 10m                                                                                               | VIZ = salt and pepper and reduced flood extent                                   |
|              | Copernicus GLO 40m<br>WorldCover 10m<br>Soilgrids (5-15cm)                                                               | VIZ = Larger flood extent overall also into minor waterways                      |

|         |                                                                                                   |                                                                                                                                      |
|---------|---------------------------------------------------------------------------------------------------|--------------------------------------------------------------------------------------------------------------------------------------|
|         | Copernicus GLO 40m<br>WorldCover 10m<br>Soilgrids (5-15cm)<br>Rainfall (Apr/2022)                 | Minimal change, slightly larger MFD                                                                                                  |
|         | Copernicus GLO 40m<br>WorldCover 10m<br>Soilgrids (5-15cm)<br>Rainfall (Apr/2022)<br>Flat terrain | VIZ = whole city exposed (unrealistic)                                                                                               |
| Beira   | Copernicus GLO 40m                                                                                | MFD = 6.3m                                                                                                                           |
|         | SRTM 40m                                                                                          | VIZ = salt and pepper<br>Lower MFD                                                                                                   |
|         | Copernicus GLO 40m<br>WorldCover 10m                                                              | MFD = 4.9m<br>VIZ = Reduced flood extent                                                                                             |
|         | Copernicus GLO 40m<br>WorldCover 10m<br>Soilgrids (5-15cm)                                        | VIZ = Flood extent spread outside major rivers (more realistic)                                                                      |
|         | Copernicus GLO 40m<br>WorldCover 10m<br>Soilgrids (5-15cm)<br>Rainfall (Apr/2019)                 | VIZ = Larger flood extent overall also into minor waterways                                                                          |
|         | Copernicus GLO 40m<br>WorldCover 10m<br>Soilgrids (5-15cm)<br>Rainfall (Feb/2021)                 | VIZ = less extent and more depth close to main riverways (less realistic)                                                            |
|         | Copernicus GLO 40m<br>WorldCover 10m<br>Soilgrids (5-15cm)<br>Rainfall (Apr/2019)<br>Flat Terrain | VIZ = whole city exposed (unrealistic)                                                                                               |
| Chimoio | Copernicus GLO 40m                                                                                | MFD = 24 m                                                                                                                           |
|         | SRTM 40m                                                                                          | MFD = 20m<br>VIZ = not so different from GLO                                                                                         |
|         | Copernicus GLO 40m<br>WorldCover 10m                                                              | MFD = 22 m<br>VIZ = Reduced flood extent                                                                                             |
|         | Copernicus GLO 40m<br>WorldCover 10m<br>Soilgrids (5-15cm)                                        | VIZ = Flood extent slightly in main riverways                                                                                        |
|         | Copernicus GLO 40m<br>WorldCover 10m<br>Soilgrids (5-15cm)<br>Rainfall (Apr/2019)                 | MFD = 26.5m<br>VIZ = larger flood depth and extent                                                                                   |
|         | Copernicus GLO 40m<br>WorldCover 10m<br>Soilgrids (5-15cm)<br>Rainfall (Apr/2019)<br>Flat terrain | MFD = 21m<br>VIZ = western part has increased flood extent, raising pressure into Revue catchment and affecting the city (realistic) |

*Table SI 3 - FastFlood Experiments in the other five cities. Remarks show consistency among the effects and flooding patterns caused by the input features.*

## Manual Workflows in QGIS

This section documents the step-by-step procedure used to delineate the city-scale catchment boundaries for each study area and to compute the Stream Power Index that guided the selection of deprived urban settlements. All operations were executed in QGIS 3.14 “Pi” on Windows 10.

### Catchment Delineation

Before the collection of input layers (Table SI 4), we conducted a desk review, collating catchment names and extent from government reports and peer-reviewed articles. Then, we

downloaded the catchment layer from HydroBASINS and GADM for each city and visually overlaid them, inspecting which basin level enclosed the entire city with minimal external upstream area. Then, we retained the smallest level that fully covered the GADM boundary still ensuring upstream contributions. For reassurance and crosscheck at city level, we downloaded the SRTM DEM and employed a workflow using SAGA GIS tools to derive our own catchments. We followed the steps presented in Table SI 5. The final extent used for the FastFlood modelling are included in the shared Zenodo repository (Data Availability Section).

| Layer                         | Properties  | Source                                                                                                        |
|-------------------------------|-------------|---------------------------------------------------------------------------------------------------------------|
| HydroBASINS levelled polygons | Levels 3–10 | <a href="https://www.hydrosheds.org/products/hydrobasins">https://www.hydrosheds.org/products/hydrobasins</a> |
| GADM administrative limits    |             | <a href="https://gadm.org/">https://gadm.org/</a>                                                             |
| SRTM DEM                      | 2014        | QGIS plug-in “SRTM-Downloader”                                                                                |
| Google Satellite              | —           | QGIS plug-in “Quick Map Services”                                                                             |

Table SI 4 - Input data for catchment delineation in QGIS.

| Step | QGIS / SAGA tool                  | Key parameters                                                                                                        |
|------|-----------------------------------|-----------------------------------------------------------------------------------------------------------------------|
| 1    | Fill sinks (Wang & Liu)           | Minimum slope = 0.01 %; Method = Wang & Liu                                                                           |
| 2    | Generate hillshade                | Azimuth = 315°, Altitude = 45°                                                                                        |
| 3    | Flow accumulation                 | Method = Deterministic 8                                                                                              |
| 4    | Channel network & drainage basins | Strahler order threshold (city dependent. The threshold chosen after visual comparison with Google Satellite Imagery. |

Table SI 5 - Steps followed to derive catchment extent from SRTM DEM using QGIS.

## SPI Computation

The Stream Power Index was calculated using the SRTM DEM and following the four steps below (Table SI 6). The flow accumulation raster (flow\_accum\_cell) was produced in cell units and the slope raster (slope\_deg) was converted to radians inside the raster calculator expression for consistency with the SPI formula. The output SPI raster is a floating tiff where higher values indicate locations with both large upstream contributing areas and steep gradients- interpreted as prone to greater erosive power and floods. The rasters were intersected with polygons of deprived urban areas to identify zones with high flow accumulation and steep slope. These spots confirmed by local partners guided the selection of communities to join the citizen science methods.

| Step               | QGIS / SAGA tool                                                                     | Key parameters / notes                                                                |
|--------------------|--------------------------------------------------------------------------------------|---------------------------------------------------------------------------------------|
| Fill sinks         | SAGA → <i>Terrain Analysis – Pre-processing</i> → <i>Fill Sinks (Wang &amp; Liu)</i> | Minimum slope = 0.01 %                                                                |
| Flow accumulation  | SAGA → <i>Terrain Analysis – Hydrology</i> → <i>Flow Accumulation (Top-Down)</i>     | Method = Deterministic 8; Output unit = Cells                                         |
| Slope (degrees)    | SAGA → <i>Terrain Analysis – Morphometry</i> → <i>Slope, Aspect, Curvature</i>       | Slope unit = Degrees                                                                  |
| Stream Power Index | QGIS <i>Raster Calculator</i>                                                        | Expression: $\ln( ("flow\_accum\_cell" + 1.0) * \tan(\text{radians}("slope\_deg")) )$ |

Table SI 6 - Steps of SAGA tools used to compute SPI in QGIS.

## Rainfall Analysis in Excel

To process and analyze the hourly rainfall observations from TAHMO gauge stations, we performed a series of procedures in Microsoft Excel. The input data from TAHMO contained folders from each available station with CSV files containing a timestamp and the precipitation

in mm. The format of the time stamp was DateTime combining date and time (MM-DD-YYYY HH:MM). We organized the data by a master workbook named Rainfall\_Analysis with one sheet per station for each city. To aggregate the hourly measurements to daily totals we:

- 1) Create a new column Date with the temporal coverage of the data (1-1-2019 to 1-1-2024).
- 2) Create a new column “Daily Precipitation” and calculate the daily totals sing SUMIF function
- 3) Inspect (using Filter function) the top measurements and create plot chart for visual inspection of the rainfall hourly and daily peaks for each available station (see Figure SI 2 as example)
- 4) Create bar chart of visual inspection of daily rainfall throughout the yearly temporal coverage (Figure SI 3)
- 5) Check completeness of the stations by counting missing hourly records using COUNTBLANK function
- 6) Check synchrony of the peak dates across available stations using COUNTIF formula

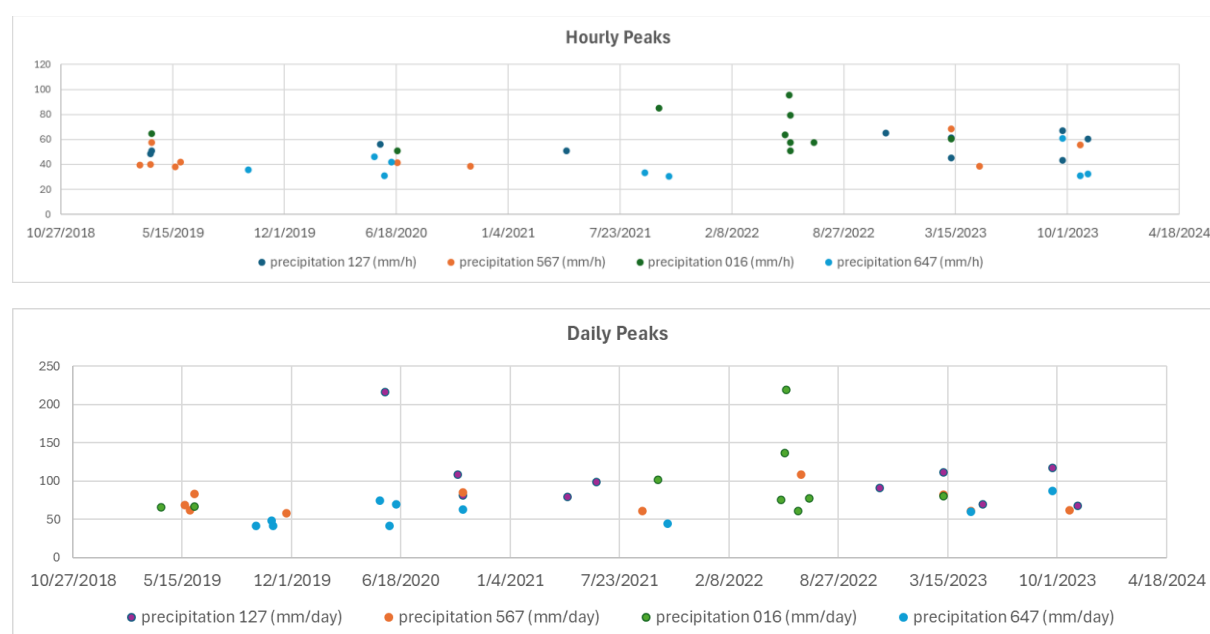

*Figure SI 2 - Plots of hourly and daily peaks for the four acquired gauge stations around Accra Metropolitan Area. Source: TAHMO.*

For cross-validation, media reports of flood incidents and local partners were consulted to match the peak dates found in the analysis for each city. The input data of the chosen stations are shared in the [online Zenodo repository](#), each sheet per city. We thank the Trans-African Hydro-Meteorological Observatory (TAHMO) for the provision of meteorological data. Interested parties may contact [info@tahmo.org](mailto:info@tahmo.org).



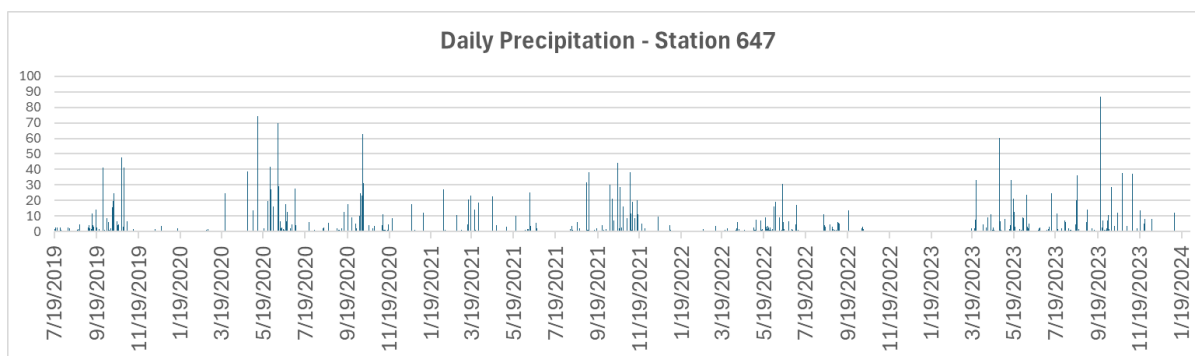

Figure SI 3 - Daily Precipitation through the available years of one station in Ghana.

### Statistical comparison of GOB and GHSL

Built-up density approach – the higher the built-up density, the higher the exposure. Three categories (low, medium and high) were statistically derived from the level of agreement between the two datasets and their data distribution patterns (Table SI 7). From Figure SI 4, we noticed a high dominance of non- to low-built up areas in both datasets from the right-skewed distribution. At first sight, around 500m<sup>2</sup> (20% of the cell is built-up) would be an adequate threshold for low density category and 1000m<sup>2</sup> (40%) for high density. We tested a range of thresholds following this data pattern globally and individually – per city. In Figure SI 5, we got the highest level of agreement between the datasets through the following thresholds: Low (up to 20% built up), Medium (up to 50% built up), High (up to 100% built up).

| Dataset | Count | Mean | Std Dev | Min | 25% | 50% | 75% | Max  |
|---------|-------|------|---------|-----|-----|-----|-----|------|
| GOB     | 32668 | 268  | 256     | ~0  | 70  | 205 | 394 | 2500 |
| GHSL    | 41558 | 427  | 397     | ~0  | 44  | 305 | 790 | 2016 |

Table SI 7 – Descriptive statistics of GOB and GHSL. This table shows only built-up. The original dataset (built up + non built up) has 65444 50x50m cells.

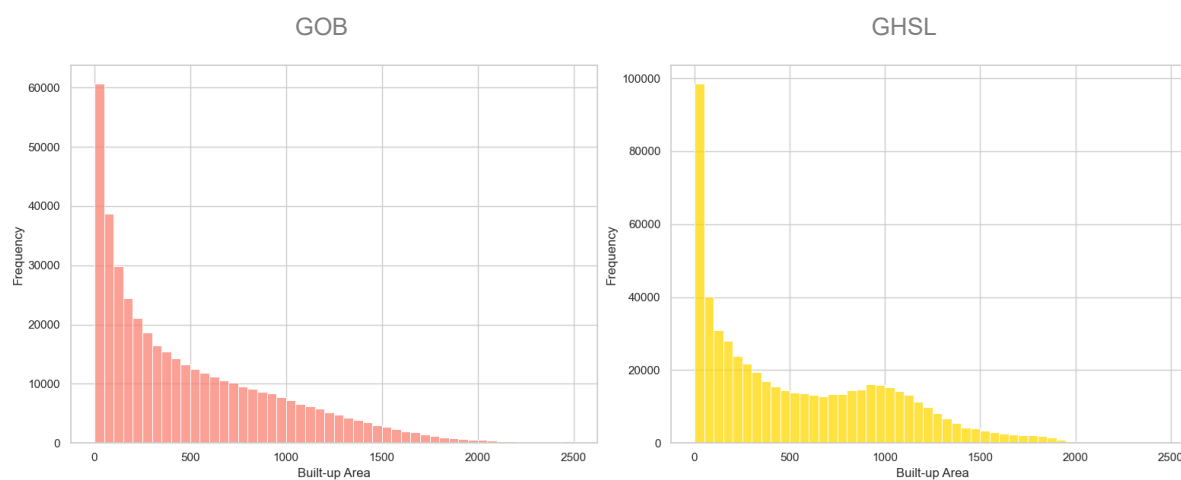

Figure SI 4 Data distribution without non-built-up areas.



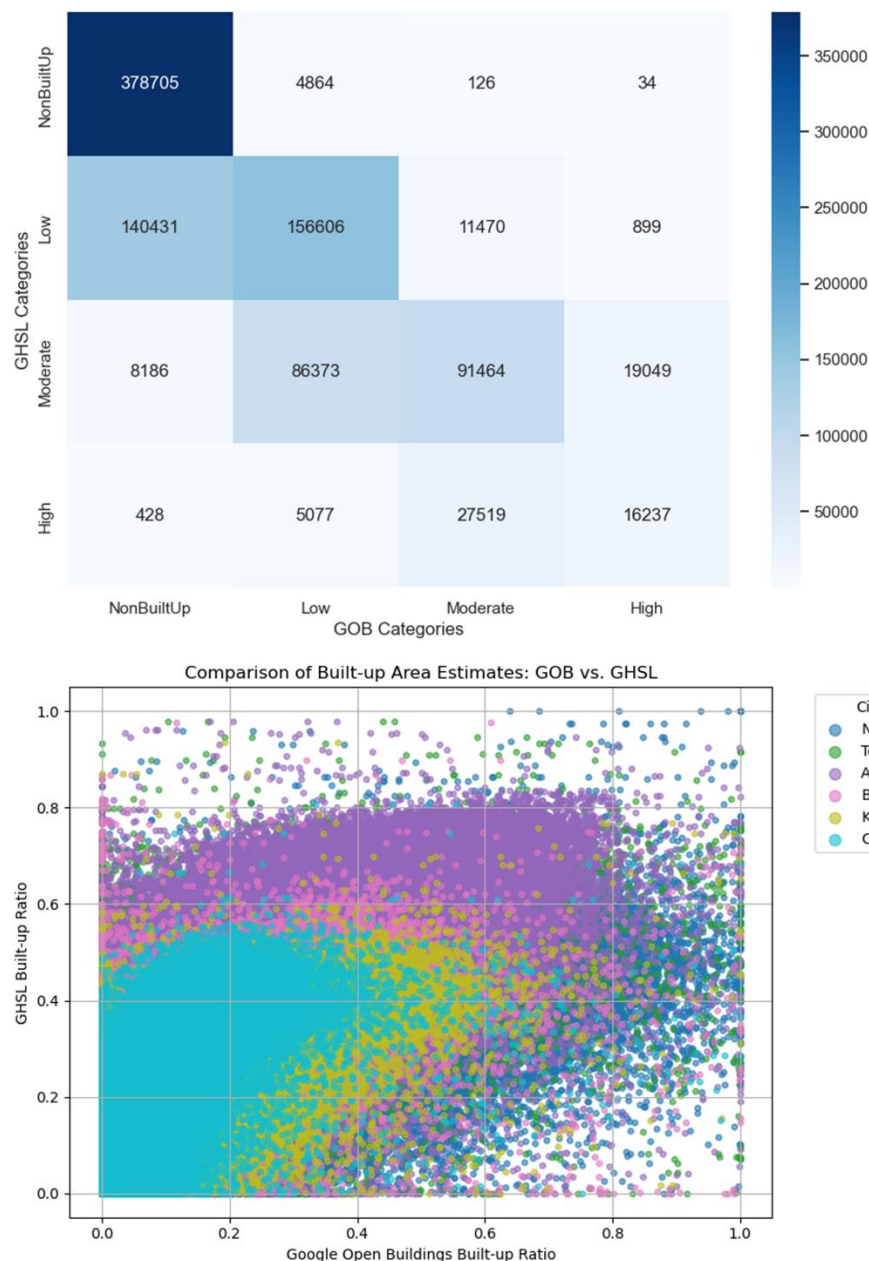

Figure SI 5 - Confusion Matrix (agreement of 70%) with selected built-up density thresholds and Scatterplot comparing GOB and GHSL per city.

## Workshop Protocols

This part documents the workshop protocol used during fieldwork, including materials, facilitation techniques, programme structure and informed consent forms. Two workshop formats were conducted: (1) city-scale workshops, engaging with institutional actors (city planners, NGOs, local academia), and (2) community-scale workshops, involving residents of deprived urban settlements. While the same protocol was followed in both formats, logistical arrangement differed. City-scale workshops were typically held in formal venues such as hotel lounges or city hall and did not include financial compensation for participants aside from lunch and transport. In contrast, community workshops were hosted in a variety of accessible local spaces-including churches, schools and even boxing clubs- to accommodate participants availability and comfort. Recognizing the economic issues of many participants, these workshops included financial compensation in addition to lunch and transport.

As part of a broader project, each workshop agenda was divided into three main sections (Table SI 8). The sequence was adjusted based on the time of arrival of most participants. Regardless of the order, all sessions began with a warm welcome and verbal presentation of the printed informed consent form (see Figure SI 6). Translation was provided by local partner or team member fluent in the native language.

In the Flood Model Assessment section (the one pertaining to this paper), the participants were split into small groups of up to five people. Groups were composed to ensure diversity of gender and age, while also accounting for power dynamics (only one community leader or government representative of the same department in each group). One group in each session worked independently (without facilitator guidance) to minimize our influence and reveal unprompted insights. A brief tutorial (30 minutes) introduced participants to basic map-reading skills and cartographic features of the printed flood maps. Three orientation questions were asked in sequence: Where is the city hall? Where are we right now? Where is your house?. Then, participants were given approximately 120 minutes for the main activities.

- Map marking and impact annotations: using pins and marker pens, groups marked flood-prone and safe locations on the printed flood maps. Using sticky notes, groups described types of floods or past impacts experienced in the locations they mapped. In Figure SI 7, we show example of such outputs.
- Plenary discussion: each group presented what they marked and shared insights with others. This process allowed us to cross-check agreement between groups (internal triangulation).

#### FLOOD MODEL ASSESSMENT

| Time       | Activity                                |
|------------|-----------------------------------------|
| 09h00-9h30 | Welcome + Consent forms + Project Intro |
| 9h30-10h   | Tutorial                                |
| 10h00-11h  | Validation exercise                     |
| 11h-12h    | Plenary Discussion                      |
| 12h-13h    | Lunch break                             |

#### LIVABILITY VOTING

| Time        | Activity     |
|-------------|--------------|
| 13h-13h15   | Introduction |
| 13h30-14h30 | Voting app   |
| 14h30-15h   | Discussion   |
| 15h-15h15   | Break        |

#### VULNERABILITY IMPACT CHAINS

| Time        | Activity                     |
|-------------|------------------------------|
| 15h15-15h45 | Introduction                 |
| 15h45-16h30 | Impact chains co-design      |
| 16h30-17h   | Feedback and closing remarks |

Table SI 8 - Programme of the workshops.

# INFORMATION LETTER/ INFORMED CONSENT FORM

Researcher(s) [redacted]  
**Introduction:** Slums and informal areas face major challenges in [redacted] including inadequate housing and sanitation, while suffering severe consequences of flood events. Yet, there is little evidence and information on them.

This workshop has three main objectives:

- (1) to understand your view of what a more livable area is. After familiarizing yourselves with satellite imagery and with a tool, you will be shown two images from different areas and will choose which one they would rather live in.
- (2) to map and assess where flood events happen. Collectively, you will evaluate the results of the flood map we've simulated, discussing the wrong and the correct flood spots.
- (3) To identify direct and indirect flood impacts in your neighborhoods

This research is community-led, we will understand floods and livability through your lenses. Your knowledge and experience will guide the data collection and outcomes. We hope the information generated today can benefit you.

**Procedures:** If you agree to participate, you will be asked to:

- 1) Share your preferences on better places to live.
- 2) Share your flooding experiences and observations about past and recent events.
- 3) Share your experience in flood direct and indirect impacts.

You are not required to share information that you are not willing to share.

All the information provided during this study will be treated as confidential. As this is for academic purposes, this data will only be accessed by us.

Your participation in this research is voluntary, you will not be forced to participate, and you have the right to opt out at any time.

If you have any questions, please feel very free to ask us.

By signing, you acknowledge that you have read and understood the information provided in this form, voluntarily agree to participate in the research study and consent the use of photos taken during the workshop for dissemination purposes.

|    | Name | Signature | Cell Phone No. |
|----|------|-----------|----------------|
| 1  |      |           |                |
| 2  |      |           |                |
| 3  |      |           |                |
| 4  |      |           |                |
| 5  |      |           |                |
| 6  |      |           |                |
| 7  |      |           |                |
| 8  |      |           |                |
| 9  |      |           |                |
| 10 |      |           |                |
| 11 |      |           |                |
| 12 |      |           |                |
| 13 |      |           |                |
| 14 |      |           |                |
| 15 |      |           |                |
| 16 |      |           |                |
| 17 |      |           |                |
| 18 |      |           |                |

Figure SI 6 - Consent form template.

## Nairobi - Mukuru

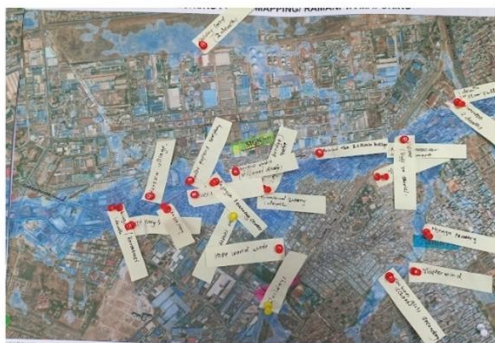

## Kisumu - Nyalenda

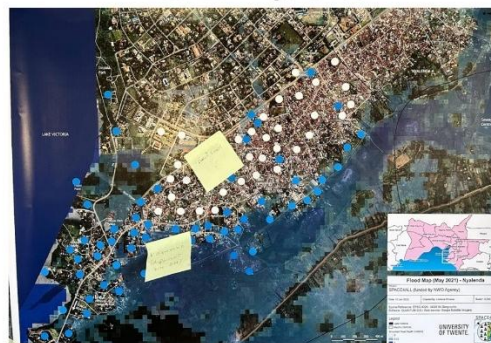

## Tema – Tulaku

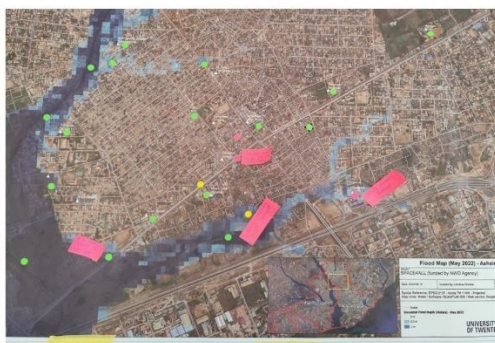

## Beira - Munhava

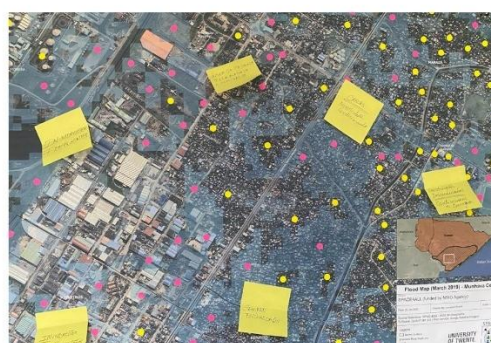

Figure SI 7 - Outputs of Flood Model Assessment Sections in community workshops.



## Content Analysis Methodology

This section outlines the systematic approach undertaken to collect and analyze flood observation data. The methodology was designed to be participatory. To quantitatively validate the flood model, we employed a community-based data collection approach, co-created in close collaboration with residents of Kibera community in Nairobi, which served as the pilot city of the project. This co-creation process ensured that the survey questions were relevant to the local context and addressed information needs of deprived communities. Key considerations during this phase included the practicality of the tool, clarity and comprehensibility of the questions. The final decision was to collect flood observation points through surveys conducted using the Google My Maps tool. The major advantages of the tool were the easy use, add photos and share – great added value for the community members. A snapshot of the My Maps survey interface used in Nairobi is provided in Figure SI8. To ensure applicability, the survey was translated for use in Mozambican cities.

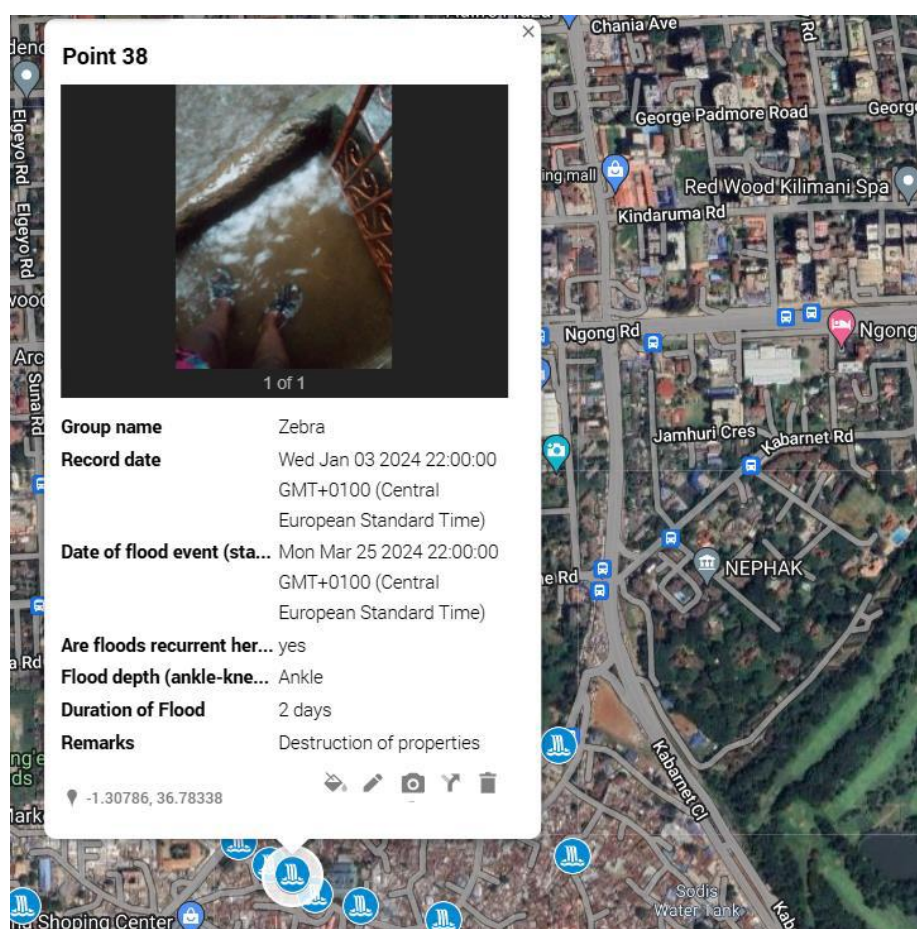

Figure SI 8 - Snapshot of My Maps survey in Nairobi.

Prior to the data collection, we trained the participants in each city. The training curriculum was based on the tutorials from Data4HumanRights material, equipping residents with the necessary skills to use the My Maps tool and understanding the survey protocol. The survey was conducted by participants working in pairs, using their own mobile devices, fostering discussion and mutual support during fieldwork – very relevant in intergenerational pairs with different technological skills. The duration of the survey ranged from one to three hours, influenced by factors such as the extent they covered and the energy of the pair. During the training, the pairs reflected on past flood events and planned the route to be conducted.

Following the surveys, a total of 338 flood observation points were collected. These raw data points underwent multi-step cleaning process to ensure quality and consistency for analysis.

These were to: 1) merge all points to a single table; 2) remove incomplete and ambiguous responses by dropping records without impacts (10 points) and without clear content, either with causing factors or quality of rainfall, (18). Table SI 9 shows common examples that were removed. We minimized the number of removed points as much as possible by resourcing to a secondary analysis based on the workshop discussions and inferred 7 unclear reported impacts in Old Fadama (Accra) and 7 in Mathare (Nairobi); 3) synonyms, capitalization and phrasing issues were fixed to facilitate consistent grouping of impacts; 4) records with two or more impacts (8%) were individually inspected and three overarching themes were identified: Destruction of Structures to Displacement, to Loss of Life or to Geophysical Hazards. Based on insights from local workshops, it was determined that displacement has only been reported as indirect impact of destruction of properties and, similarly, geophysical hazards (erosion and landslide) as direct impacts after floods, thus, they were incorporated to single impacts “Displacement” and “Environmental Issues”, respectively. However, as loss of life could occur independently of or in conjunction to destruction of properties, two distinct categories were maintained “Loss of life” and “Destruction of Property & Loss of Life”. This process resulted in nine standardized flood impact themes, which formed the basis for all subsequent thematic analysis (Figure SI 9). The detailed codebook for each theme is available [here](#).

| Sample of remarks                  | Coding        | Action  |
|------------------------------------|---------------|---------|
| Lack of drainage                   | Not an impact | Removed |
| Drainage was done by the community | Not an impact | Removed |
| Floods were heavier last year      | Not an impact | Removed |
| Accountability                     | Not an impact | Removed |
| The flood doesn't floor            | Unclear       | Removed |

Table SI 9 - Sample of content reported as impacts but removed from thematic analysis.

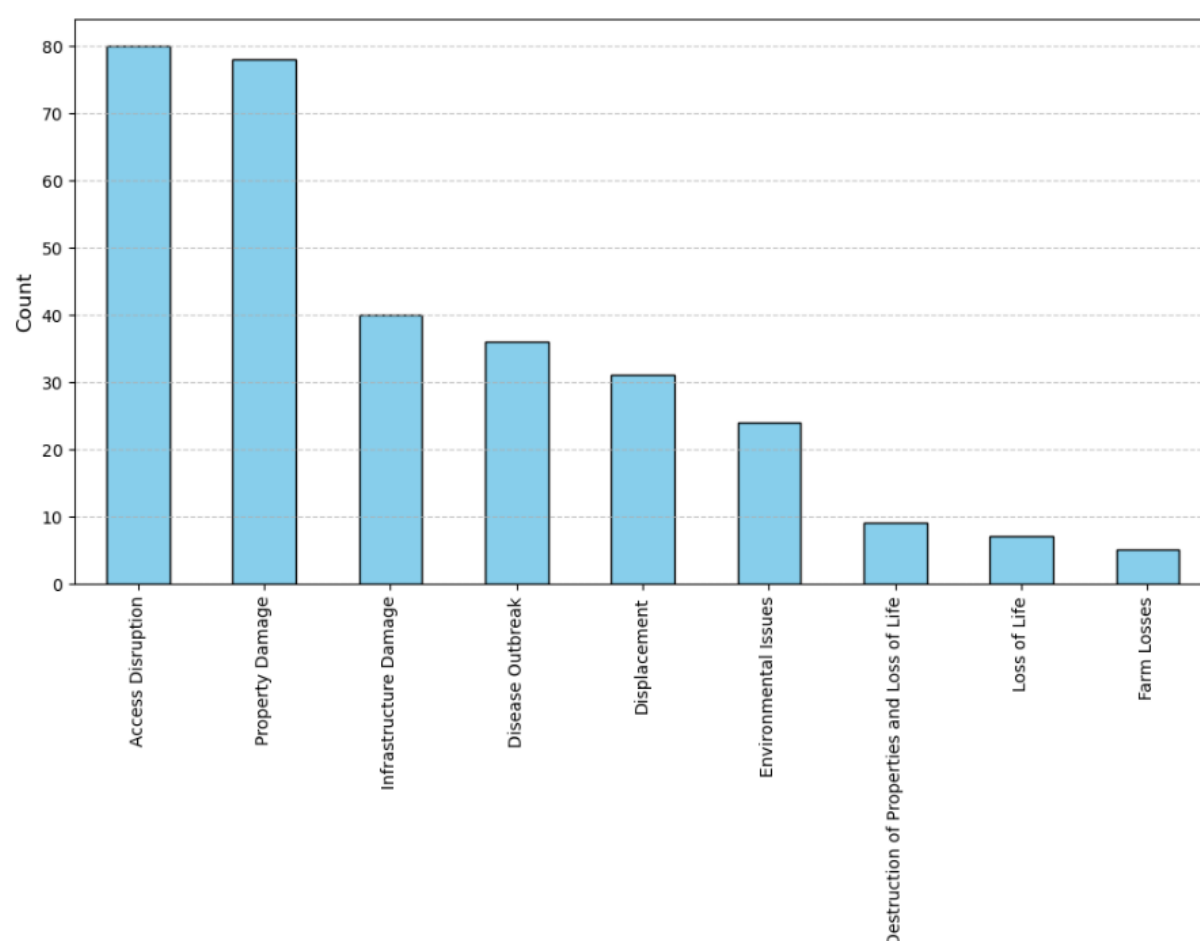

Figure SI 9 - Frequency of standardized themes used in content analysis.

## References

1. MEF. *NATIONAL CLIMATE CHANGE ACTION PLAN (NCCAP) 2018-2022*. (2018).
2. EPA. *Ghana's Fourth National Communication to the United Nations Framework Convention on Climate Change (UNFCCC): National Climate Change Report*. (2020).
3. Elias, P. & de Albuquerque, J. P. Data and the Localization of Sustainable Development Goals in Africa: The Case of SDG 11 in Lagos and Accra. 115–131 (2022).  
doi:10.1007/978-3-030-95979-1\_8
